# Supplementary figures and images for: Self-trapped excitons at the quartz(0001) surface
Source: Royal Society of Chemistry journal article supplement (doi:10.1039/b006289h), 2000-01-01

# O displaced STE on the hydroxylated surface

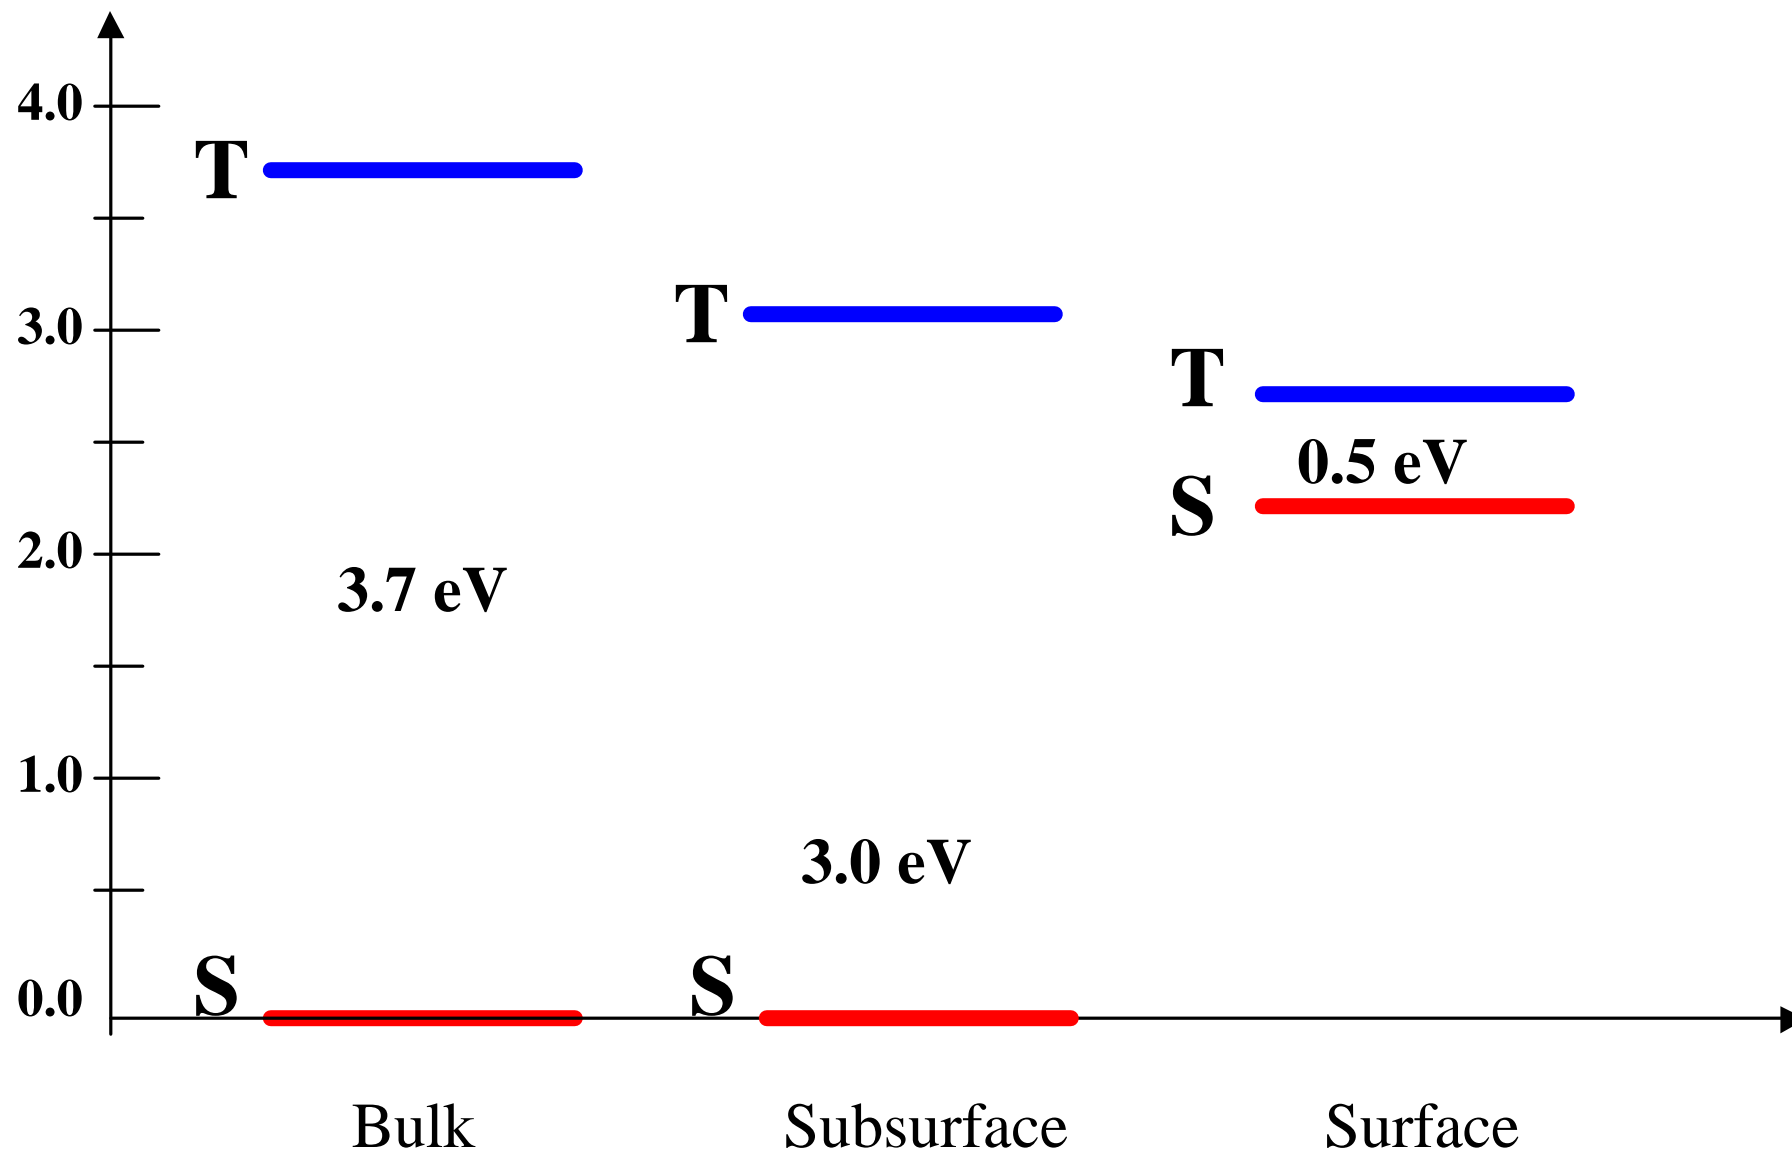

Supplement: fig6.pdf [file fig6.pdf]
